# Supplementary material for: ICAM-1-decorated extracellular vesicles loaded with miR-146a and Glut1 drive immunomodulation and hinder tumor progression in a murine model of breast cancer
Source: Royal Society of Chemistry journal article supplement (doi:10.1039/d3bm00573a), 2023-01-01
Supplement: d3bm00573a1.pdf [file d3bm00573a1.pdf]

# ICAM-1-decorated extracellular vesicles loaded with miR-146a and *Glut1* drive immunomodulation and hinder tumor progression in a murine model of breast cancer

*Silvia Duarte-Sanmiguel<sup>1</sup>, Ana I. Salazar-Puerta<sup>1,2</sup>, Ana Panic<sup>1</sup>, Daniel Dodd<sup>1,3</sup>, Carlie Francis<sup>1</sup>, Diego Alzate-Correa<sup>1,2</sup>, Lilibeth Ortega-Pineda<sup>1</sup>, Luke Lemmerman<sup>1</sup>, Maria A. Rincon-Benavides<sup>1,2,4</sup>, Kavya Dathathreya<sup>1</sup>, William Lawrence<sup>1,3</sup>, Neil Ott<sup>1</sup>, Jingjing Zhang<sup>5</sup>, Binbin Deng<sup>6</sup>, Shipeng Wang<sup>1</sup>, Sandra P. Santander<sup>7</sup>, David W. McComb<sup>6,8</sup>, Eduardo Reategui<sup>5</sup>, Andre F. Palmer<sup>5</sup>, William E. Carson<sup>9</sup>, Natalia Higueta-Castro<sup>1,2,4,9,10\*</sup>, Daniel Gallego-Perez<sup>1,2,4,9,10\*</sup>*

<sup>1</sup> The Ohio State University, Department of Biomedical Engineering, Columbus, OH 43210

<sup>2</sup> The Ohio State University, Gene Therapy Institute, Columbus, OH 43210

<sup>3</sup> The Ohio State University, Biomedical Sciences Graduate Program, Columbus, OH 43210

<sup>4</sup> The Ohio State University, Biophysics Program, Columbus, OH 43210

<sup>5</sup> The Ohio State University, William G. Lowrie Department of Chemical and Biomolecular Engineering, Columbus, OH 43210

<sup>6</sup> The Ohio State University, Center for Electron Microscopy and Microanalysis (CEMAS), Columbus, OH 43210

<sup>7</sup> Juan N. Corpas University Foundation, Center of Phytoimmunomodulation Department of Medicine, Bogota, Colombia

<sup>8</sup> The Ohio State University, Department of Materials Science and Engineering, Columbus, OH 43210

<sup>9</sup> The Ohio State University, Department of Surgery, Columbus, OH 43210

<sup>10</sup> The Ohio State University, Dorothy M. Davis Heart and Lung Research Institute, Columbus, OH 43210

\*Corresponding Authors: [gallegoperez.1@osu.edu](mailto:gallegoperez.1@osu.edu) and [higuitacastro.1@osu.edu](mailto:higuitacastro.1@osu.edu)

## SUPPORTING INFORMATION

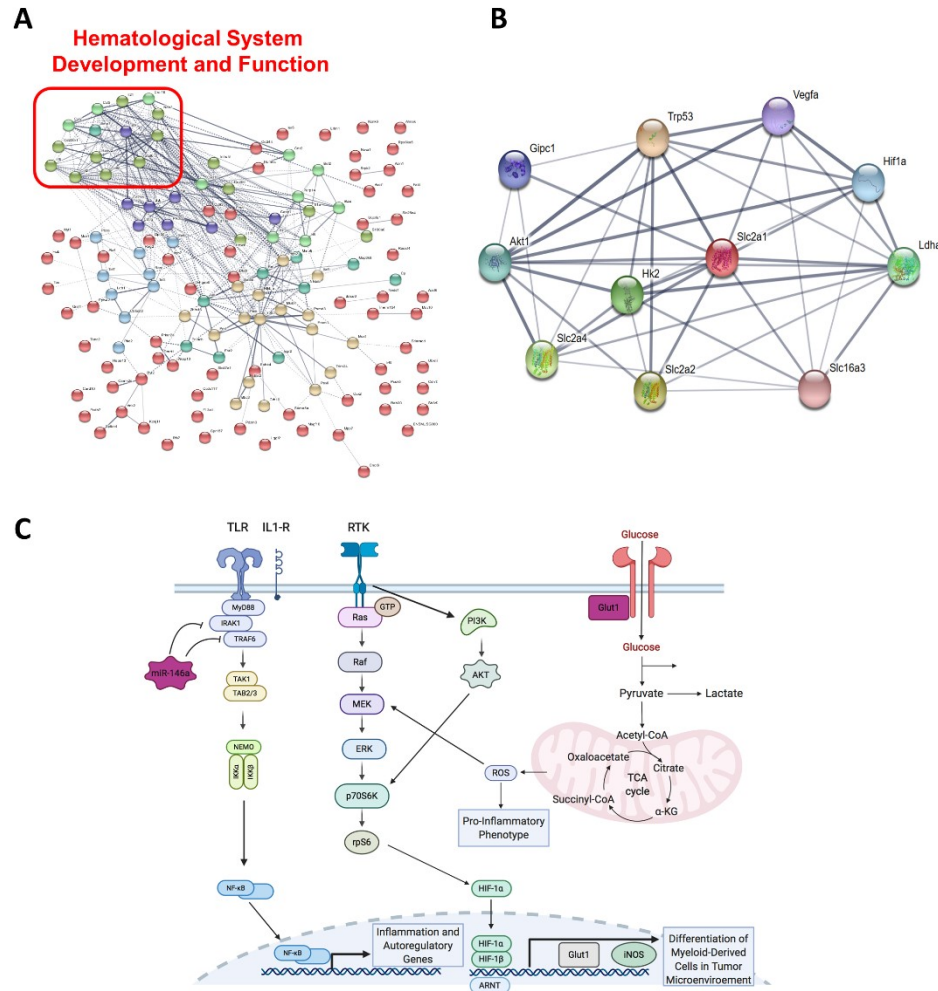

**Supplementary Figure 1. *In silico* functional analysis identifying signaling pathways common to miR-146a and *Glut1*.** (A) Functional interacting network of miR-146a-5p and miR-146a-3p targets leads to the identification of a subgroup of interacting genes involved in *Hematological System Development and Function*. (B) Functional interacting network of *Glut1* (Slca2a1). (C). Common factors between miR-146a and *Glut1* functional interacting networks suggest that the pro-inflammatory repolarization seen in MDSCs could potentially be partially mediated by the Hypoxia-Inducible Factor (HIF)-1 regulatory pathway.

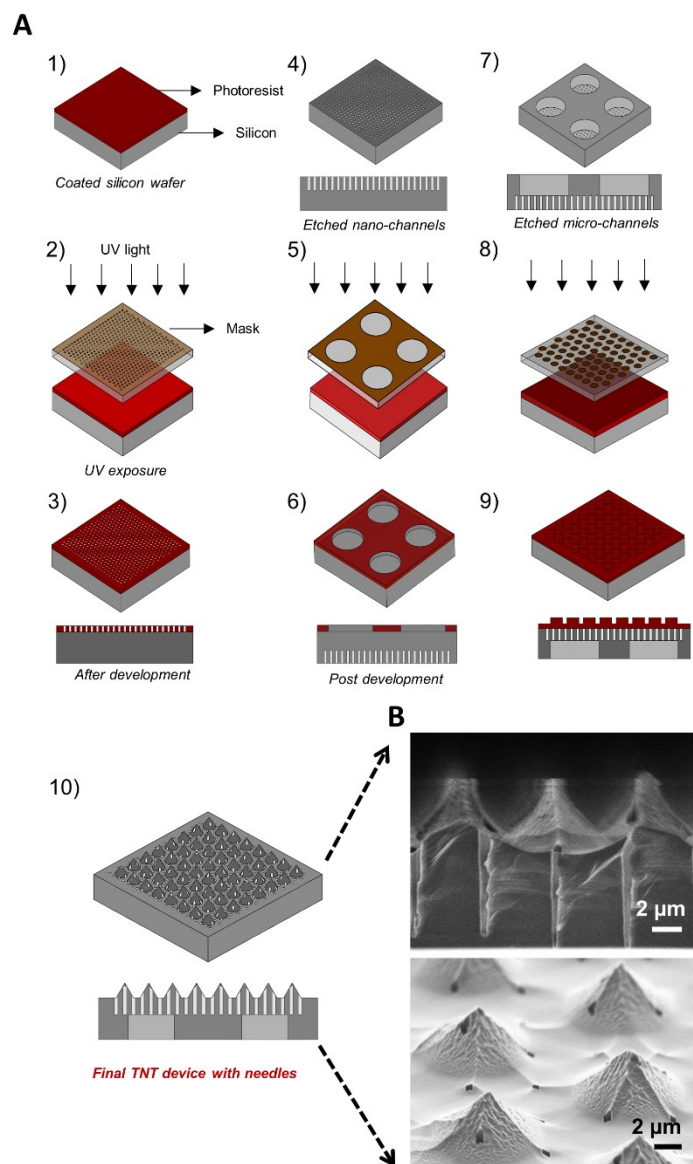

**Supplementary Figure 2. TNT chip fabrication.** (A) Schematic diagram showing the fabrication process for TNT devices. First, nanoscale openings are patterned and etched into the Si wafer surface using a combination of lithography and DRIE (1-4). Next, microscale reservoirs are drilled on the back side of the wafer using lithography and DRIE to gain fluidic access to the nanochannels (5-7). Lastly, microscale photoresist (PR) pillars were patterned on the nanochannel side and used as an etch mask to define the needles using SF<sub>6</sub>, which undercuts the PR to form the needle (8-10). (B) SEM images of the cross-section and surface of the TNT device.

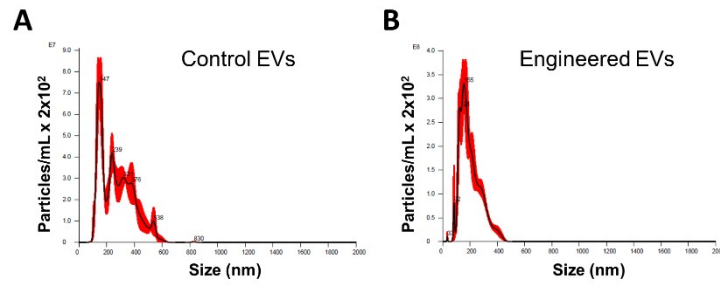

**Supplemental Figure 3. Characterization of in vitro derived engineered EVs.** NanoSight analysis showing the concentration (dilution factor  $2 \times 10^2$ ) and size distribution of **(A)** control EVs and **(B)** engineered EVs produced and released by the ‘donor’ cells 24 hours after transfection.

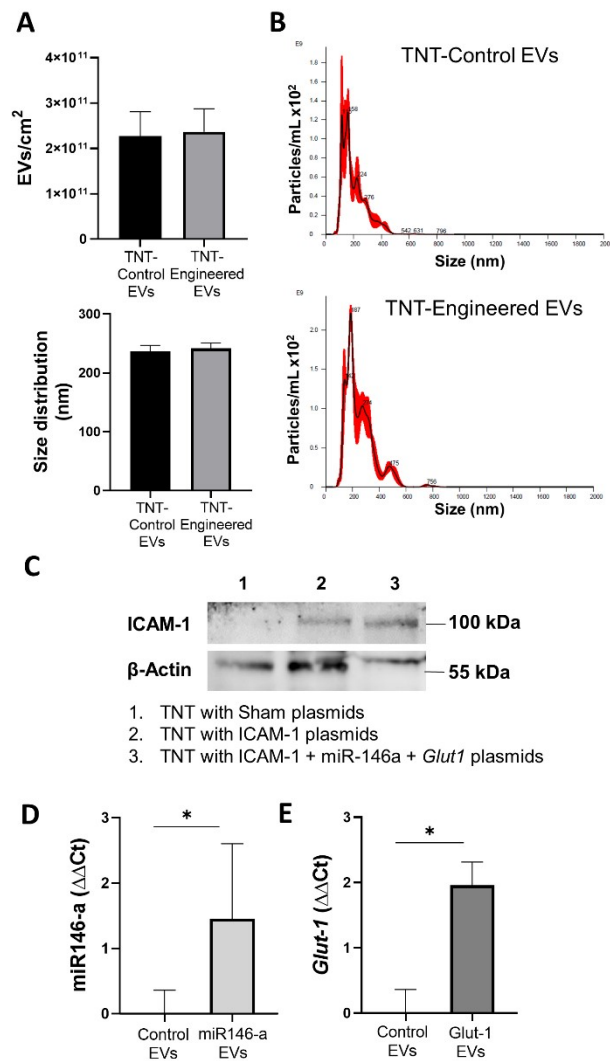

**Supplemental Figure 4. Characterization of skin derived EVs after TNT treatment.** (A) NanoSight analysis of the amount and average size and (B) individual plots showing the particle distribution in terms of concentration (dilution factor 1X10<sup>2</sup>) and size of the EVs obtained from 1 cm<sup>2</sup> of TNT-treated skin. (C) Western blot analysis confirmed the presence of ICAM-1 protein in the ICAM-1 decorated EVs loaded with sham, and engineered EVs (ICAM-1 decorated EVs loaded with miR-146-a + *Glut1*) compared to control EVs (without ICAM-1), using β-actin as the internal control. RT-qPCR quantification of (D) miR-146a and (E) *Glut1* loading inside engineered skin EVs compared to skin-derived control skin EVs.

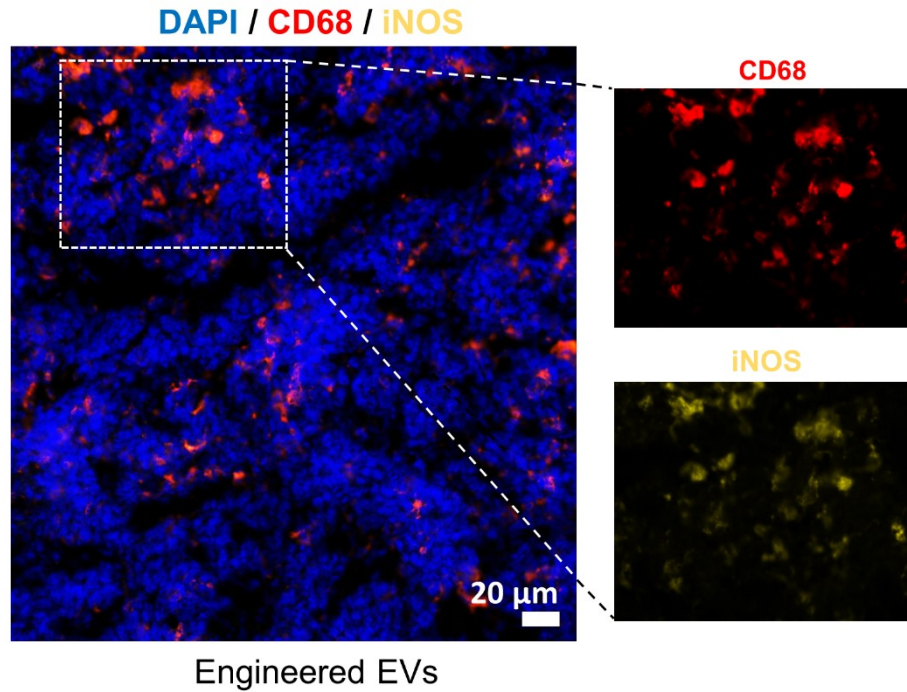

**Supplemental Figure 5. Co-localization analysis of iNOS expression with macrophages.** Representative fluorescence micrograph of tumor tissue showing the expression of the pro-inflammatory marker iNOS (yellow), the expression of the classically activated (M1-like) macrophage marker CD68 (red), and the nuclear stain DAPI (blue). Analyses of the double positive signal of iNOS and CD68 in tumor tissue revealed a co-localization of ~70%.
